# Supplementary material for: Removal of Dominant Species Impairs Nitrogen Utilization in Co-Existing Ledum palustre and Vaccinium uliginosum Communities Subjected to Five-Year Continuous Interruptions
Source: MDPI journal article supplement (doi:10.3390/agronomy12040932), 2022-04-13
Supplement: s1 [file s1]

Table S1. Primer sequences for real-time quantitative PCR of fungi.

| Organism | Direction | Primer | Sequence (5'java)            |
|----------|-----------|--------|------------------------------|
| Fungus   | Forward   | ITS1F  | 5'-CTTGGTCATTTAGAGGAAGTAA-3' |
| ITS      | Reverse   | ITS4   | 5'-TCCTCCGCTTATTGATATGC-3'   |
